# Supplementary material
Source: Springer Nature journal article supplement (https://www.springermedizin.de/resource/supplementary/12931_2013_1383_MOESM4_ESM.pdf/9426148)

### A. Differentiation

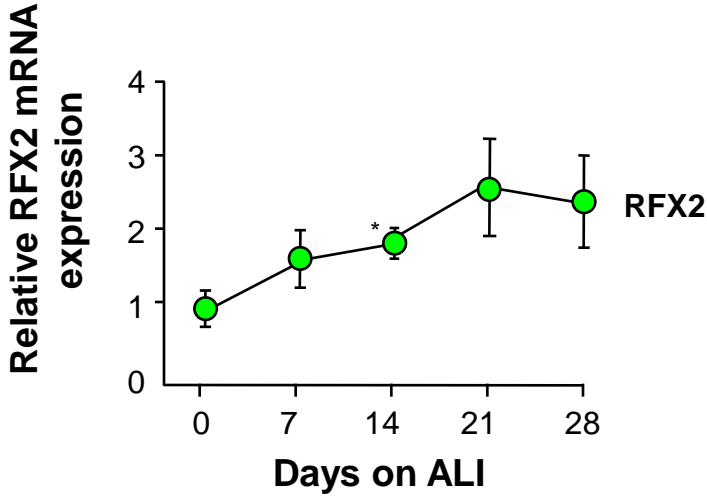

### B. mRNA

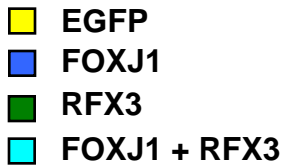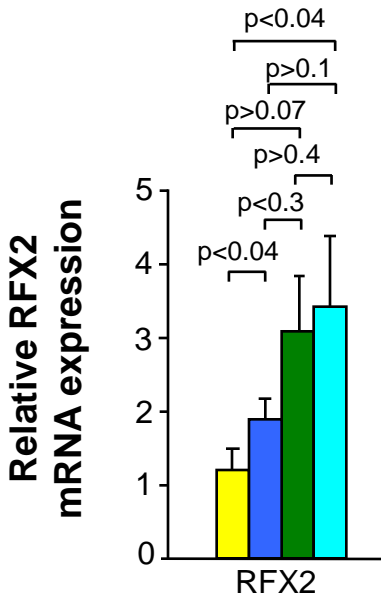

### C. Promoter activity

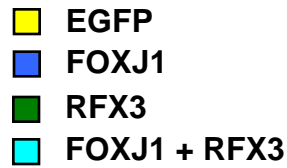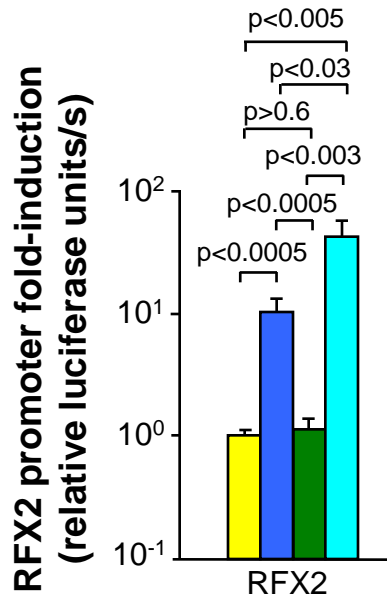

Supplement: MOESM4 [file 9426148]
